# Supplementary material for: Gene deleted live attenuated Leishmania vaccine candidates against visceral leishmaniasis elicit pro-inflammatory cytokines response in human PBMCs
Source: PubMed Central journal article supplement (PMC5021981; doi:10.1038/srep33059), 2016-09-14
Supplement: srep33059-s1.pdf [file srep33059-s1.pdf]

**Gene deleted live attenuated *Leishmania* vaccine candidates against visceral leishmaniasis elicit pro-inflammatory cytokines response in human PBMCs**

**Kumar Avishek<sup>1</sup>(M.Sc.), Himanshu Kaushal<sup>1</sup>(M.Sc.), Sreenivas**

**Gannavaram<sup>2</sup>(Ph.D.), Ranadhir Dey<sup>2</sup>(Ph.D.), Angamuthu**

**Selvapandiyani<sup>3</sup>(Ph.D.), V Ramesh<sup>4</sup>(M.D.), Narender Singh Negi<sup>5</sup>(M.D.), Uma S.**

**Dubey<sup>6</sup>(Ph.D.), Hira L. Nakhasi<sup>2</sup>(Ph.D.) and Poonam Salotra<sup>1\*</sup>(Ph.D.)**

<sup>1</sup>National Institute of Pathology (ICMR), Safdarjung Hospital Campus, New Delhi,

India. <sup>2</sup>Division of Emerging and Transfusion Transmitted Diseases, CBER, FDA,

Bethesda, MD, USA. <sup>3</sup>Institute of Molecular Medicine, New Delhi, India,

<sup>4</sup>Department of Dermatology, VMMC and Safdarjung Hospital, India. <sup>5</sup>Department of

Medicine, VMMC & Safdarjung Hospital, New Delhi, India. <sup>6</sup>Department of

Biological Sciences, Birla Institute of Technology and Science Pilani, Rajasthan,

India.

\*Reprints or correspondence:

Poonam Salotra

National Institute of Pathology (ICMR)

Safdarjung Hospital Campus

New Delhi-110029, INDIA

Tel: 91-11-2616 6124

Fax: 91-11-2619 8401

E-mail: [salotra@vsnl.com](mailto:salotra@vsnl.com)

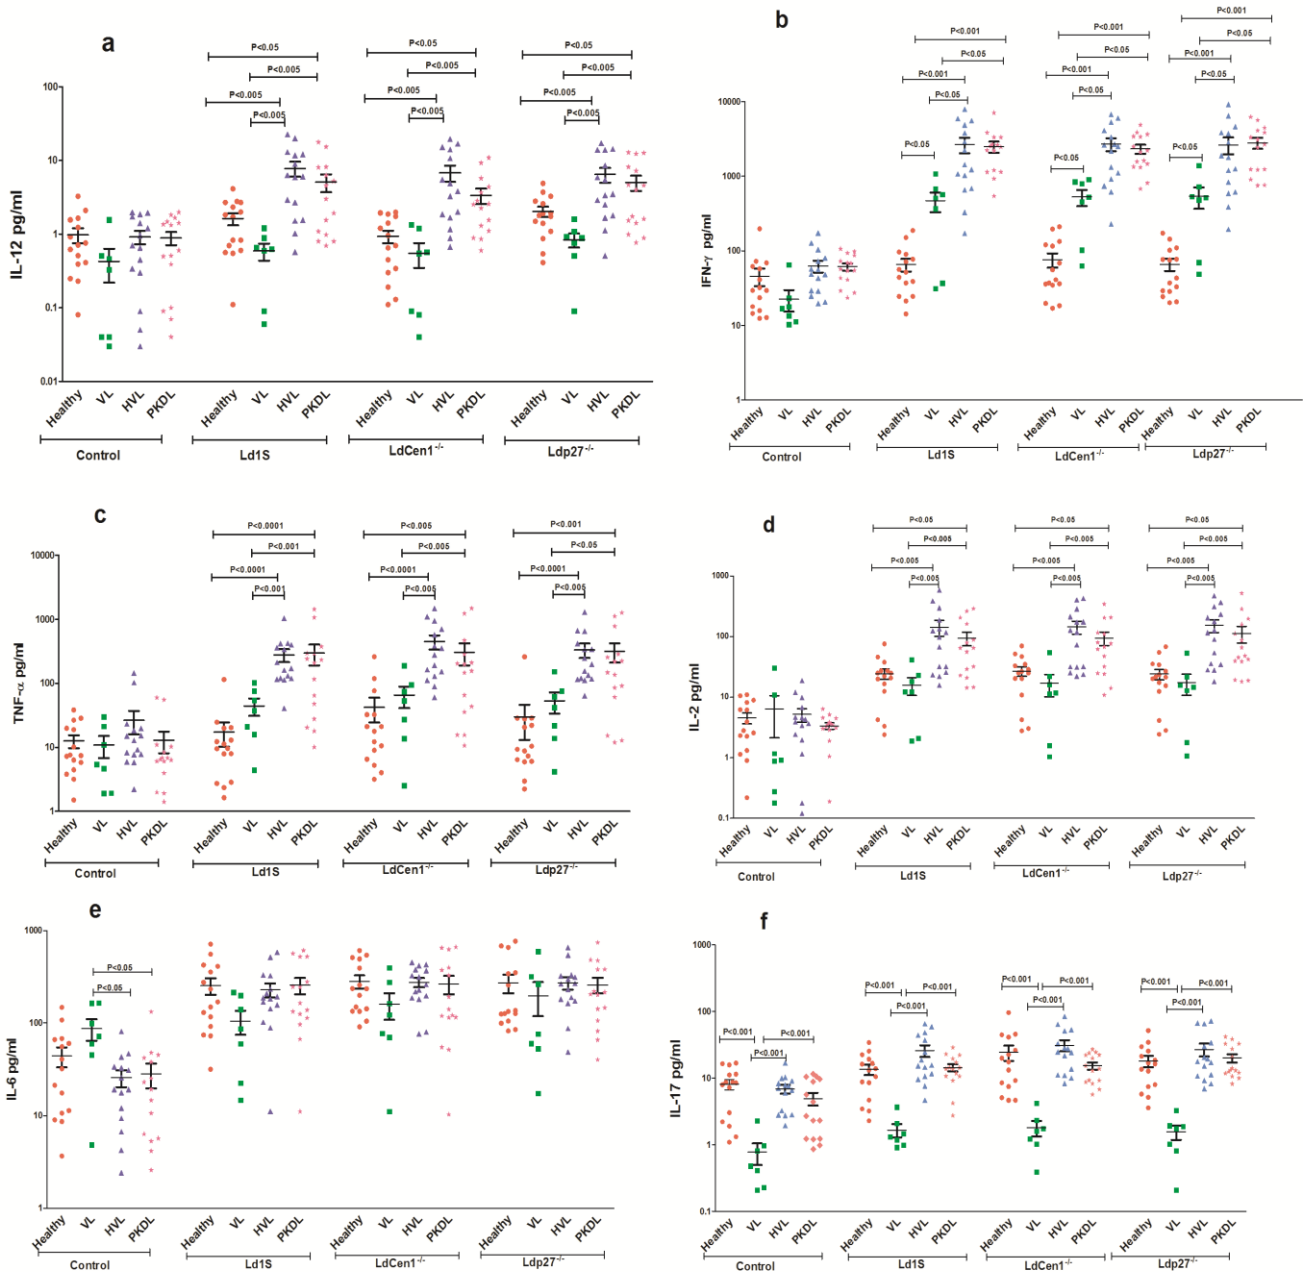

**Supplementary figure. 1** Level of pro-inflammatory cytokines stimulated in culture supernatant of PBMCs obtained from healthy, HVL, VL and PKDL groups by wild type (*Ld1S*), *LdCen1*<sup>-/-</sup> and *Ldp27*<sup>-/-</sup> parasites. The results are expressed as scattering of individual values and data are given in Mean±SEM (pg/ml) of (a) IL-12, (b) IFN- $\gamma$ , (c) TNF- $\alpha$ , (d) IL-2, (e) IL-6 and (f) IL-17. Significance was determined by Mann-Whitney U test.  $P < 0.05$  is considered statistically significant.

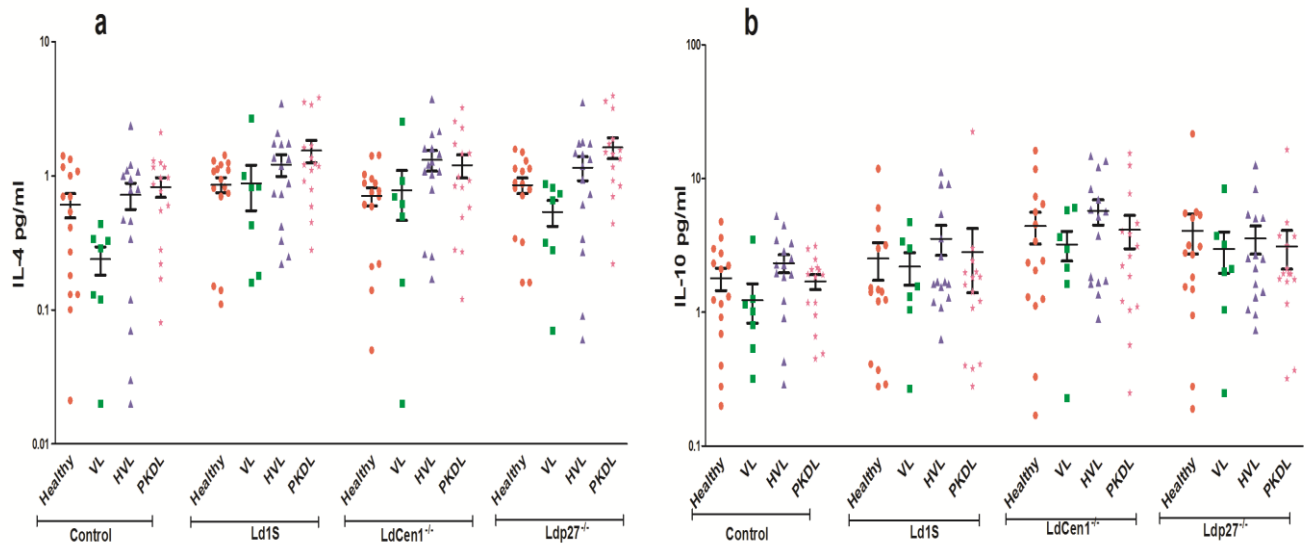

**Supplementary figure. 2** Level of anti-inflammatory cytokines stimulated in culture supernatant of PBMCs obtained from healthy, HVL, VL and PKDL groups by wild type (*Ld1S*), *LdCen1*<sup>-/-</sup> and *Ldp27*<sup>-/-</sup> parasites. The results are expressed as scattering of individual values and data are given in Mean±SEM (pg/ml) of (a) IL-4 and (b) IL-10. Significance was determined by Mann-Whitney U test. P < 0.05 is considered statistically significant.
